# Supplementary material
Source: publisher site journal article supplement (https://www.spandidos-publications.com/8428/downloadSupplementary)

Figure S1. Receiver operating characteristic curve analysis for angiotensin-like 4 expression. The optimal cut-off value (7.7%) was determined by maximizing Youden's index.

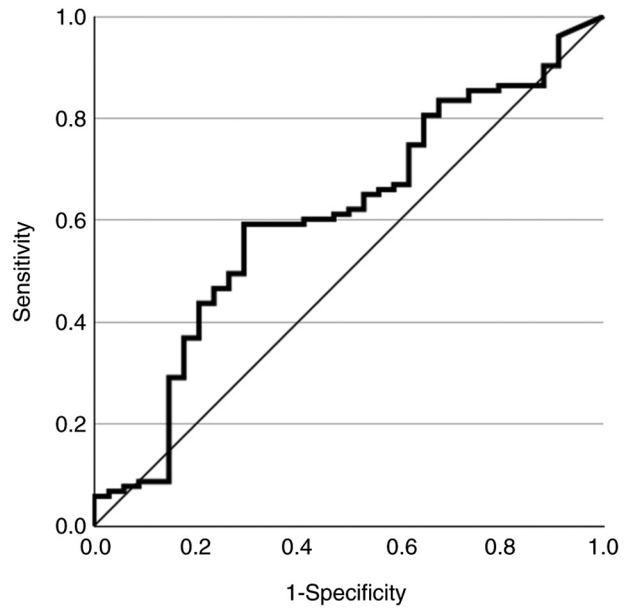

Supplement: Supplementary file [file downloadSupplementary]
